# Supplementary material for: Protein content and amino acids profile in 10 cultivars of ginkgo (Ginkgo biloba L.) nut from China
Source: R Soc Open Sci. 2019 Mar 13;6(3):181571. doi: 10.1098/rsos.181571 (PMC6458402; doi:10.1098/rsos.181571)
Supplement: Raw data [file rsos181571supp1.xlsx]

## Sheet: Sheet1
Cultivar	Sample	N content / %	Amino acid concentration / mg/mL
			Asp	Thr	Ser	Glu	Pro	Gly	Ala	Cys	Val	Met	Ile	Leu	Tyr	Phe	His	Lys	Arg
1	1-1	2.62	0.003553	0.001295	0.00088	0.004631	0.001668	0.001149	0.001646	0.000108	0.001731	0.000448	0.001107	0.002047	0.000764	0.000999	0.000884	0.000785	0.002601
	1-2	3.27	0.004768	0.001683	0.001083	0.005258	0.001736	0.001467	0.0021	0.000137	0.002094	0.000565	0.001403	0.002639	0.001019	0.001355	0.001199	0.000939	0.003404
	1-3	2.97	0.00566	0.001987	0.001317	0.006678	0.002209	0.001808	0.002585	0.000106	0.002559	0.000608	0.001735	0.003197	0.001085	0.001562	0.001201	0.001298	0.0046
2	2-1	3.4	0.006704	0.001832	0.001018	0.00723	0.001978	0.002071	0.002791	0.000111	0.003245	0.000779	0.002219	0.003778	0.001249	0.001797	0.001518	0.001104	0.004623
	2-2	3.27	0.007575	0.003221	0.002822	0.009621	0.003587	0.002995	0.003468	6.4e-05	0.003547	0.001003	0.002567	0.004651	0.001742	0.002301	0.00168	0.001848	0.006675
	2-3	3.12	0.006528	0.00268	0.002369	0.008377	0.002345	0.002537	0.002894	7.5e-05	0.003205	0.000649	0.002273	0.003995	0.001372	0.001909	0.001495	0.001479	0.005721
3	3-1	3.15	0.004252	0.001421	0.000939	0.005204	0.001776	0.001402	0.002013	9.6e-05	0.002298	0.000262	0.001598	0.002551	0.000914	0.001287	0.001044	0.001097	0.004185
	3-2	3.38	0.004873	0.001293	0.000781	0.005565	0.002161	0.001536	0.001987	9.1e-05	0.00226	0.000396	0.001618	0.002663	0.000931	0.001296	0.001159	0.000991	0.004447
	3-3	3.32	0.005685	0.001882	0.00124	0.00675	0.002357	0.001833	0.002481	8.2e-05	0.002755	0.000659	0.001939	0.003254	0.001179	0.001551	0.001328	0.001195	0.004795
4	4-1	3.33	0.006701	0.002762	0.002576	0.009497	0.002159	0.002752	0.003213	6.3e-05	0.002898	0.000932	0.002222	0.004186	0.001629	0.001984	0.001519	0.001749	0.006804
	4-2	3.2	0.006812	0.002692	0.002206	0.009199	0.002597	0.002529	0.003229	6.1e-05	0.002923	0.000947	0.002252	0.004235	0.001639	0.001969	0.001591	0.001663	0.006706
	4-3	2.85	0.005101	0.002258	0.001928	0.007424	0.002397	0.001937	0.002853	8.8e-05	0.002475	0.000735	0.001875	0.00356	0.001349	0.001592	0.001396	0.001033	0.005372
5	5-1	3.72	0.007652	0.002183	0.001218	0.009189	0.002381	0.002614	0.003265	7.5e-05	0.003861	0.000573	0.002684	0.004477	0.001553	0.002062	0.001561	0.001616	0.006445
	5-2	3.9	0.006006	0.001728	0.000993	0.007068	0.001943	0.002033	0.002588	7e-05	0.003015	0.000641	0.002077	0.00344	0.001357	0.00162	0.001211	0.001437	0.004996
	5-3	2.91	0.009383	0.002629	0.001571	0.010481	0.003294	0.003096	0.00382	9.4e-05	0.004457	0.001038	0.00312	0.00528	0.001912	0.002457	0.00188	0.001986	0.007364
6	6-1	3.58	0.007087	0.003127	0.002632	0.010081	0.002871	0.002605	0.00385	7.3e-05	0.00353	0.001016	0.002564	0.004819	0.001698	0.002065	0.001827	0.001434	0.006947
	6-2	3.43	0.005982	0.002498	0.001981	0.008682	0.00259	0.001986	0.003401	0.000115	0.003947	0.000575	0.002577	0.004248	0.001425	0.001856	0.001461	0.00147	0.00611
	6-3	3.61	0.008005	0.002323	0.001393	0.009841	0.002345	0.002661	0.003351	0.000102	0.003951	0.000713	0.002718	0.004544	0.001528	0.001926	0.001706	0.001696	0.006456
7	7-1	3.3	0.006932	0.001973	0.001067	0.008291	0.001909	0.002165	0.002993	8.7e-05	0.003259	0.000864	0.002331	0.003976	0.001448	0.001805	0.001472	0.001456	0.005801
	7-2	2.72	0.003798	0.00138	0.000905	0.004829	0.001552	0.001165	0.001809	9.5e-05	0.002034	0.000369	0.00139	0.002325	0.000828	0.001125	0.000947	0.000813	0.003221
	7-3	2.84	0.004399	0.001745	0.001154	0.006046	0.00182	0.001401	0.00235	9e-05	0.002255	0.000586	0.001543	0.002792	0.001098	0.00137	0.001126	0.001029	0.003668
8	8-1	3.63	0.003986	0.00194	0.001891	0.00574	0.001809	0.001297	0.002311	0.000108	0.0027	0.000464	0.001875	0.003048	0.00093	0.001237	0.001178	0.000952	0.004504
	8-2	3.46	0.004731	0.002256	0.002207	0.006992	0.002271	0.001546	0.002788	0.000123	0.003004	0.000616	0.002125	0.003537	0.001147	0.001509	0.001331	0.001171	0.005175
	8-3	3.05	0.003924	0.001901	0.001915	0.00617	0.001596	0.001636	0.002371	0.000109	0.002424	0.000534	0.001748	0.003008	0.001029	0.001368	0.001086	0.00117	0.00469
9	9-1	2.46	0.002876	0.001475	0.0015	0.003091	0.000955	0.001202	0.001285	0.000108	0.00188	0.000406	0.000875	0.001608	0.000682	0.001097	0.001071	0.001015	0.001901
	9-2	2.24	0.002368	0.00116	0.001227	0.002792	0.000859	0.000758	0.001216	0.000105	0.001689	0.000258	0.000757	0.0013	0.000525	0.000804	0.000762	0.000751	0.001779
	9-3	3.06	0.004142	0.002002	0.001941	0.005491	0.002061	0.001246	0.002357	0.000107	0.002819	0.000476	0.001714	0.002844	0.000747	0.001122	0.001193	0.000791	0.003454
10	10-1	3.2	0.003423	0.001649	0.001747	0.00506	0.001645	0.001436	0.001654	9.8e-05	0.002021	0.000369	0.001258	0.002137	0.000841	0.001225	0.00104	0.001082	0.003169
	10-2	2.98	0.003051	0.00149	0.001497	0.004807	0.001538	0.001324	0.001528	0.000114	0.001951	0.000359	0.001179	0.001998	0.000659	0.001155	0.001092	0.000819	0.002691
	10-3	2.53	0.002065	0.000934	0.001025	0.002919	0.0007	0.0009	0.001028	0.000136	0.001372	0.000203	0.000792	0.001327	0.000434	0.000807	0.000787	0.000768	0.002041
